# Supplementary material for: Designing indacenodithiophene based non-fullerene acceptors with a donor–acceptor combined bridge for organic solar cells
Source: Royal Society of Chemistry journal article supplement (doi:10.1039/c8ra09292c), 2019-01-01
Supplement: c8ra09292c1.pdf [file c8ra09292c1.pdf]

## Supporting Information

### Designing Indacenodithiophene Based Non-fullerene Acceptors with Donor-Acceptor Combined Bridge for Organic Solar Cells

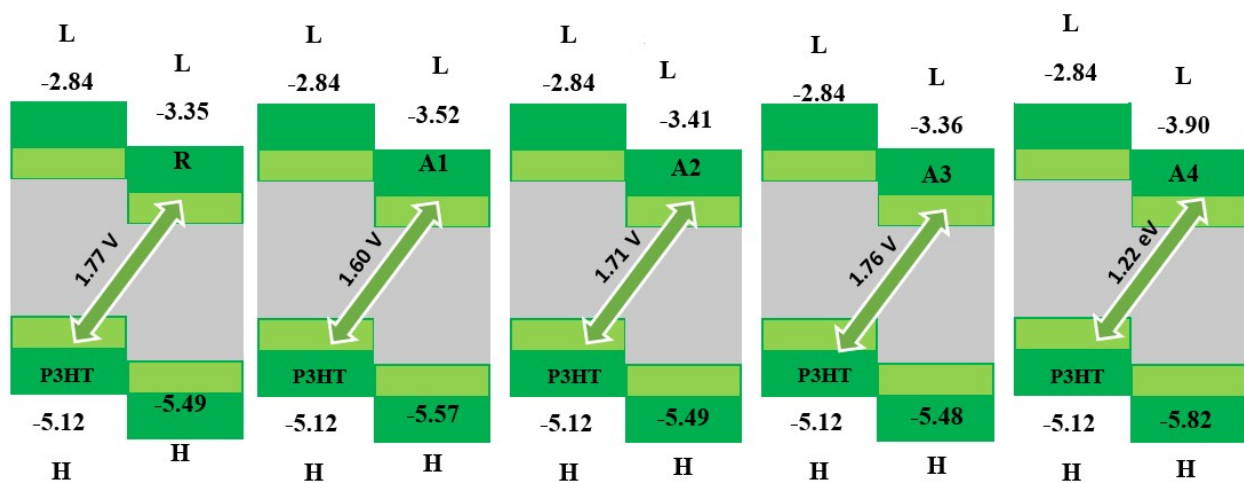

**Figure S1.** The open circuit voltages ( $V_{oc}$ ) of reference **R** and designed molecules **A1**, **A2**, **A3** and **A4** with respect to donor material P3HTTh.

### Mullikan Charges

#### Designed Molecule M1

| Serial No | Symbol | Mullikan Charge |
|-----------|--------|-----------------|
| 1         | C      | 0.076           |
| 2         | C      | -0.161          |
| 3         | C      | 0.043           |
| 4         | C      | 0.075           |
| 5         | C      | -0.160          |
| 6         | C      | 0.042           |
| 7         | C      | -0.227          |
| 8         | C      | 0.056           |
| 9         | C      | -0.232          |
| 10        | C      | -0.227          |
| 11        | C      | -0.062          |
| 12        | C      | -0.231          |
| 13        | C      | -0.062          |
| 14        | C      | -0.297          |
| 15        | S      | -0.231          |
| 16        | C      | -0.062          |
| 17        | C      | -0.296          |
| 18        | S      | 0.385           |

|           |          |               |
|-----------|----------|---------------|
| <b>19</b> | <b>C</b> | <b>0.089</b>  |
| <b>20</b> | <b>C</b> | <b>0.096</b>  |
| <b>21</b> | <b>C</b> | <b>0.088</b>  |
| <b>22</b> | <b>C</b> | <b>0.096</b>  |
| <b>23</b> | <b>C</b> | <b>0.201</b>  |
| <b>24</b> | <b>C</b> | <b>0.201</b>  |
| <b>25</b> | <b>C</b> | <b>-0.242</b> |
| <b>26</b> | <b>C</b> | <b>0.332</b>  |
| <b>27</b> | <b>C</b> | <b>0.092</b>  |
| <b>28</b> | <b>C</b> | <b>0.183</b>  |
| <b>29</b> | <b>C</b> | <b>0.186</b>  |
| <b>30</b> | <b>C</b> | <b>-0.241</b> |
| <b>31</b> | <b>C</b> | <b>0.330</b>  |
| <b>32</b> | <b>C</b> | <b>0.098</b>  |
| <b>33</b> | <b>C</b> | <b>0.184</b>  |
| <b>34</b> | <b>C</b> | <b>0.186</b>  |
| <b>35</b> | <b>N</b> | <b>-0.601</b> |
| <b>36</b> | <b>S</b> | <b>0.635</b>  |
| <b>37</b> | <b>N</b> | <b>-0.595</b> |
| <b>38</b> | <b>N</b> | <b>-0.603</b> |
| <b>39</b> | <b>S</b> | <b>0.636</b>  |
| <b>40</b> | <b>N</b> | <b>-0.595</b> |
| <b>41</b> | <b>C</b> | <b>-0.143</b> |
| <b>42</b> | <b>C</b> | <b>-0.160</b> |
| <b>43</b> | <b>C</b> | <b>0.089</b>  |
| <b>44</b> | <b>C</b> | <b>-0.159</b> |
| <b>45</b> | <b>C</b> | <b>-0.139</b> |
| <b>46</b> | <b>C</b> | <b>-0.144</b> |
| <b>47</b> | <b>C</b> | <b>-0.162</b> |
| <b>48</b> | <b>C</b> | <b>0.089</b>  |
| <b>49</b> | <b>C</b> | <b>-0.159</b> |
| <b>50</b> | <b>C</b> | <b>-0.145</b> |
| <b>51</b> | <b>C</b> | <b>0.145</b>  |
| <b>52</b> | <b>C</b> | <b>-0.158</b> |
| <b>53</b> | <b>C</b> | <b>0.089</b>  |
| <b>54</b> | <b>C</b> | <b>-0.162</b> |
| <b>55</b> | <b>C</b> | <b>-0.144</b> |
| <b>56</b> | <b>C</b> | <b>-0.143</b> |
| <b>57</b> | <b>C</b> | <b>-0.160</b> |
| <b>58</b> | <b>C</b> | <b>0.089</b>  |
| <b>59</b> | <b>C</b> | <b>-0.159</b> |
| <b>60</b> | <b>C</b> | <b>-0.139</b> |
| <b>61</b> | <b>C</b> | <b>-0.450</b> |
| <b>62</b> | <b>C</b> | <b>-0.450</b> |
| <b>63</b> | <b>C</b> | <b>-0.450</b> |

|     |   |        |
|-----|---|--------|
| 64  | C | -0.450 |
| 65  | C | -0.241 |
| 66  | C | -0.245 |
| 67  | C | -0.102 |
| 68  | C | -0.102 |
| 69  | C | -0.202 |
| 70  | S | 0.418  |
| 71  | C | -0.119 |
| 72  | C | -0.073 |
| 73  | C | -0.253 |
| 74  | S | 0.412  |
| 75  | C | -0.098 |
| 76  | C | -0.116 |
| 77  | H | 0.149  |
| 78  | H | 0.148  |
| 79  | H | 0.146  |
| 80  | H | 0.146  |
| 81  | H | 0.157  |
| 82  | H | 0.157  |
| 83  | H | 0.133  |
| 84  | H | 0.124  |
| 85  | H | 0.123  |
| 86  | H | 0.132  |
| 87  | H | 0.136  |
| 88  | H | 0.123  |
| 89  | H | 0.123  |
| 90  | H | 0.136  |
| 91  | H | 0.136  |
| 92  | H | 0.123  |
| 93  | H | 0.124  |
| 94  | H | 0.136  |
| 95  | H | 0.133  |
| 96  | H | 0.124  |
| 97  | H | 0.123  |
| 98  | H | 0.132  |
| 99  | H | 0.157  |
| 100 | H | 0.147  |
| 101 | H | 0.144  |
| 102 | H | 0.147  |
| 103 | H | 0.143  |
| 104 | H | 0.158  |
| 105 | H | 0.157  |
| 106 | H | 0.144  |
| 107 | H | 0.145  |
| 108 | H | 0.157  |

|     |   |        |
|-----|---|--------|
| 109 | H | 0.145  |
| 110 | H | 0.145  |
| 111 | H | 0.163  |
| 112 | H | 0.156  |
| 113 | H | 0.162  |
| 114 | H | 0.199  |
| 115 | H | 0.178  |
| 116 | F | -0.285 |
| 117 | F | -0.287 |
| 118 | C | 0.002  |
| 119 | C | 0.093  |
| 120 | C | 0.030  |
| 121 | C | -0.027 |
| 122 | C | 0.407  |
| 123 | O | -0.504 |
| 124 | C | 0.036  |
| 125 | C | 0.328  |
| 126 | N | -0.517 |
| 127 | C | 0.324  |
| 128 | N | -0.510 |
| 129 | C | -0.196 |
| 130 | C | 0.317  |
| 131 | C | 0.321  |
| 132 | C | -0.187 |
| 133 | H | 0.198  |
| 134 | H | 0.184  |
| 135 | C | -0.075 |
| 136 | C | 0.104  |
| 137 | C | 0.013  |
| 138 | C | 0.001  |
| 139 | C | 0.383  |
| 140 | O | -0.484 |
| 141 | C | -0.033 |
| 142 | C | 0.329  |
| 143 | N | -0.511 |
| 144 | C | 0.330  |
| 145 | N | -0.492 |
| 146 | C | -0.199 |
| 147 | C | 0.319  |
| 148 | C | 0.320  |
| 149 | C | -0.180 |
| 150 | H | 0.195  |
| 151 | H | 0.186  |
| 152 | H | 0.159  |
| 153 | F | -0.272 |

|     |   |        |
|-----|---|--------|
| 154 | F | -0.273 |
| 155 | F | -0.272 |
| 156 | F | -0.274 |

### Designed Molecule M2

| Serial No | Symbol | Mullikan Charge |
|-----------|--------|-----------------|
| 1         | C      | 0.075           |
| 2         | C      | -0.161          |
| 3         | C      | 0.043           |
| 4         | C      | 0.075           |
| 5         | C      | -0.161          |
| 6         | C      | 0.043           |
| 7         | C      | 0.227           |
| 8         | C      | 0.055           |
| 9         | C      | -0.232          |
| 10        | C      | -0.227          |
| 11        | C      | 0.056           |
| 12        | C      | -0.232          |
| 13        | C      | -0.063          |
| 14        | C      | -0.297          |
| 15        | S      | 0.3835          |
| 16        | C      | -0.063          |
| 17        | C      | -0.296          |
| 18        | S      | 0.0384          |
| 19        | C      | 0.089           |
| 20        | C      | 0.096           |
| 21        | C      | 0.089           |
| 22        | C      | 0.096           |
| 23        | C      | 0.201           |
| 24        | C      | 0.201           |
| 25        | C      | -0.242          |
| 26        | C      | 0.330           |
| 27        | C      | 0.093           |
| 28        | C      | 0.181           |
| 29        | C      | 0.186           |
| 30        | C      | -0.241          |
| 31        | C      | 0.329           |
| 32        | C      | 0.099           |
| 33        | C      | 0.183           |
| 34        | C      | 0.186           |

|    |   |        |
|----|---|--------|
| 35 | N | -0.600 |
| 36 | S | 0.633  |
| 37 | N | 0.596  |
| 38 | N | -0.602 |
| 39 | S | 0.634  |
| 40 | N | -0.596 |
| 41 | C | -0.143 |
| 42 | C | -0.160 |
| 43 | C | 0.089  |
| 44 | C | -0.159 |
| 45 | C | -0.139 |
| 46 | C | -0.144 |
| 47 | C | -0.162 |
| 48 | C | 0.089  |
| 49 | C | -0.158 |
| 50 | C | -0.145 |
| 51 | C | -0.145 |
| 52 | C | -0.159 |
| 53 | C | 0.089  |
| 54 | C | -0.162 |
| 55 | C | -0.144 |
| 56 | C | -0.143 |
| 57 | C | -0.160 |
| 58 | C | 0.089  |
| 59 | C | -0.159 |
| 60 | C | -0.139 |
| 61 | C | -0.450 |
| 62 | C | -0.450 |
| 63 | C | -0.450 |
| 64 | C | -0.450 |
| 65 | C | -0.242 |
| 66 | C | -0.246 |
| 67 | C | -0.102 |
| 68 | C | -0.103 |
| 69 | C | -0.201 |
| 70 | S | 0.4175 |
| 71 | C | -0.120 |
| 72 | C | -0.074 |
| 73 | C | -0.253 |
| 74 | S | 0.410  |
| 75 | C | -0.099 |
| 76 | C | -0.116 |
| 77 | H | 0.148  |
| 78 | H | 0.148  |
| 79 | H | 0.146  |

|     |   |        |
|-----|---|--------|
| 80  | H | 0.146  |
| 81  | H | 0.157  |
| 82  | H | 0.156  |
| 83  | H | 0.133  |
| 84  | H | 0.123  |
| 85  | H | 0.122  |
| 86  | H | 0.32   |
| 87  | H | 0.136  |
| 88  | H | 0.123  |
| 89  | H | 0.123  |
| 90  | H | 0.136  |
| 91  | H | 0.136  |
| 92  | H | 0.123  |
| 93  | H | 0.123  |
| 94  | H | 0.136  |
| 95  | H | 0.133  |
| 96  | H | 0.124  |
| 97  | H | 0.122  |
| 98  | H | 0.132  |
| 99  | H | 0.157  |
| 100 | H | 0.147  |
| 101 | H | 0.161  |
| 102 | H | 0.146  |
| 103 | H | 0.143  |
| 104 | H | 0.157  |
| 105 | H | 0.157  |
| 106 | H | 0.127  |
| 107 | H | 0.145  |
| 108 | H | 0.156  |
| 109 | H | 0.145  |
| 110 | H | 0.145  |
| 111 | H | 0.161  |
| 112 | H | 0.154  |
| 113 | H | 0.161  |
| 114 | H | 0.199  |
| 115 | H | 0.176  |
| 116 | F | -0.286 |
| 117 | F | -0.287 |
| 118 | C | 0.001  |
| 119 | C | 0.091  |
| 120 | C | 0.030  |
| 121 | C | 0.116  |
| 122 | C | 0.486  |
| 123 | O | -0.506 |
| 124 | C | 0.033  |

|     |   |        |
|-----|---|--------|
| 125 | C | 0.328  |
| 126 | N | -0.519 |
| 127 | C | 0.323  |
| 128 | N | -0.513 |
| 129 | C | -0.135 |
| 130 | C | -0.134 |
| 131 | C | -0.127 |
| 132 | C | -0.126 |
| 133 | H | 0.177  |
| 134 | H | 0.149  |
| 135 | H | 0.146  |
| 136 | H | 0.161  |
| 137 | C | -0.076 |
| 138 | C | 0.101  |
| 139 | C | 0.014  |
| 140 | C | 0.011  |
| 141 | C | 0.382  |
| 142 | O | -0.487 |
| 143 | C | 0.032  |
| 144 | C | 0.329  |
| 145 | N | -0.513 |
| 146 | C | 0.330  |
| 147 | N | -0.449 |
| 148 | C | -0.139 |
| 149 | C | 0.132  |
| 150 | C | -0.127 |
| 151 | C | -0.127 |
| 152 | H | 0.173  |
| 153 | H | 0.149  |
| 154 | H | 0.146  |
| 155 | H | 0.163  |
| 156 | H | 0.158  |

### Designed Molecules M3

| Serial No | Symbol | Mullikan Charge |
|-----------|--------|-----------------|
| 1         | C      | 0.075           |
| 2         | C      | -0.161          |
| 3         | C      | 0.043           |
| 4         | C      | 0.076           |
| 5         | C      | -0.161          |
| 6         | C      | 0.043           |
| 7         | C      | -0.227          |
| 8         | C      | 0.055           |
| 9         | C      | -0.232          |



|    |   |        |
|----|---|--------|
| 10 | C | 0.227  |
| 11 | C | 0.055  |
| 12 | C | -0.232 |
| 13 | C | -0.062 |
| 14 | C | -0.296 |
| 15 | S | 0.3872 |
| 16 | C | -0.063 |
| 17 | C | -0.296 |
| 18 | S | 0.283  |
| 19 | C | 0.089  |
| 20 | C | 0.096  |
| 21 | C | 0.089  |
| 22 | C | 0.096  |
| 23 | C | 0.200  |
| 24 | C | 0.200  |
| 25 | C | 0.242  |
| 26 | C | 0.329  |
| 27 | C | 0.099  |
| 28 | C | 0.178  |
| 29 | C | 0.184  |
| 30 | C | -0.242 |
| 31 | C | 0.329  |
| 32 | C | 0.094  |
| 33 | C | 0.184  |
| 34 | C | 0.186  |
| 35 | N | -0.593 |
| 36 | S | 0.630  |
| 37 | N | -0.597 |
| 38 | N | -0.601 |
| 39 | S | 0.632  |
| 40 | N | -0.596 |
| 41 | C | -0.143 |
| 42 | C | -0.160 |
| 43 | C | 0.089  |
| 44 | C | -0.159 |
| 45 | C | -0.138 |
| 46 | C | -0.144 |
| 47 | C | -0.162 |
| 48 | C | -0.089 |
| 49 | C | -0.158 |
| 50 | C | -0.145 |
| 51 | C | -0.145 |
| 52 | C | -0.159 |
| 53 | C | 0.089  |
| 54 | C | -0.162 |

|    |   |        |
|----|---|--------|
| 55 | C | -0.144 |
| 56 | C | -0.143 |
| 57 | C | -0.160 |
| 58 | C | 0.089  |
| 59 | C | -0.159 |
| 60 | C | -0.138 |
| 61 | C | -0.450 |
| 62 | C | -0.450 |
| 63 | C | -0.450 |
| 64 | C | -0.450 |
| 65 | C | -0.271 |
| 66 | C | -0.243 |
| 67 | C | -0.119 |
| 68 | C | -0.075 |
| 69 | C | -0.252 |
| 70 | S | 0.407  |
| 71 | C | -0.107 |
| 72 | C | -0.117 |
| 73 | C | -0.213 |
| 74 | S | 0.476  |
| 75 | C | -0.121 |
| 76 | C | -0.126 |
| 77 | H | 0.148  |
| 78 | H | 0.148  |
| 79 | H | 0.145  |
| 80 | H | 0.145  |
| 81 | H | 0.1569 |
| 82 | H | 0.156  |
| 83 | H | 0.133  |
| 84 | H | 0.123  |
| 85 | H | 0.122  |
| 86 | H | 0.132  |
| 87 | H | 0.136  |
| 88 | H | 0.123  |
| 89 | H | 0.123  |
| 90 | H | 0.136  |
| 91 | H | 0.136  |
| 92 | H | 0.123  |
| 93 | H | 0.123  |
| 94 | H | 0.136  |
| 95 | H | 0.133  |
| 96 | H | 0.123  |
| 97 | H | 0.122  |
| 98 | H | 0.132  |
| 99 | H | 0.157  |

|            |          |               |
|------------|----------|---------------|
| <b>100</b> | <b>H</b> | <b>0.146</b>  |
| <b>101</b> | <b>H</b> | <b>0.143</b>  |
| <b>102</b> | <b>H</b> | <b>0.145</b>  |
| <b>103</b> | <b>H</b> | <b>0.143</b>  |
| <b>104</b> | <b>H</b> | <b>0.157</b>  |
| <b>105</b> | <b>H</b> | <b>0.157</b>  |
| <b>106</b> | <b>H</b> | <b>0.145</b>  |
| <b>107</b> | <b>H</b> | <b>0.145</b>  |
| <b>108</b> | <b>H</b> | <b>0.156</b>  |
| <b>109</b> | <b>H</b> | <b>0.144</b>  |
| <b>110</b> | <b>H</b> | <b>0.145</b>  |
| <b>111</b> | <b>H</b> | <b>0.161</b>  |
| <b>112</b> | <b>H</b> | <b>0.198</b>  |
| <b>113</b> | <b>H</b> | <b>0.160</b>  |
| <b>114</b> | <b>H</b> | <b>0.163</b>  |
| <b>115</b> | <b>H</b> | <b>0.159</b>  |
| <b>116</b> | <b>F</b> | <b>-0.287</b> |
| <b>117</b> | <b>F</b> | <b>-0.286</b> |
| <b>118</b> | <b>C</b> | <b>-0.028</b> |
| <b>119</b> | <b>C</b> | <b>0.114</b>  |
| <b>120</b> | <b>C</b> | <b>0.015</b>  |
| <b>121</b> | <b>C</b> | <b>-0.265</b> |
| <b>122</b> | <b>C</b> | <b>0.442</b>  |
| <b>123</b> | <b>O</b> | <b>-0.485</b> |
| <b>124</b> | <b>C</b> | <b>0.038</b>  |
| <b>125</b> | <b>C</b> | <b>0.322</b>  |
| <b>126</b> | <b>N</b> | <b>-0.515</b> |
| <b>127</b> | <b>C</b> | <b>0.327</b>  |
| <b>128</b> | <b>N</b> | <b>-0.516</b> |
| <b>129</b> | <b>C</b> | <b>-0.058</b> |
| <b>130</b> | <b>C</b> | <b>-0.357</b> |
| <b>131</b> | <b>S</b> | <b>0.378</b>  |
| <b>132</b> | <b>H</b> | <b>0.119</b>  |
| <b>133</b> | <b>H</b> | <b>0.187</b>  |
| <b>134</b> | <b>C</b> | <b>0.02</b>   |
| <b>135</b> | <b>C</b> | <b>0.105</b>  |
| <b>136</b> | <b>C</b> | <b>0.021</b>  |
| <b>137</b> | <b>C</b> | <b>-0.271</b> |
| <b>138</b> | <b>C</b> | <b>0.445</b>  |
| <b>139</b> | <b>O</b> | <b>-0.499</b> |
| <b>140</b> | <b>C</b> | <b>0.3040</b> |
| <b>141</b> | <b>C</b> | <b>0.325</b>  |
| <b>142</b> | <b>N</b> | <b>-0.516</b> |
| <b>143</b> | <b>C</b> | <b>0.324</b>  |
| <b>144</b> | <b>N</b> | <b>-0.510</b> |

|     |   |        |
|-----|---|--------|
| 145 | C | -0.058 |
| 146 | C | -0.375 |
| 147 | S | 0.378  |
| 148 | H | 0.190  |
| 149 | H | 0.188  |
| 150 | H | 0.159  |

### Designed Molecule M4

| Serial No | Symbol | Mullikan Charge |
|-----------|--------|-----------------|
| 1         | C      | 0.076           |
| 2         | C      | -0.159          |
| 3         | C      | 0.044           |
| 4         | C      | 0.075           |
| 5         | C      | -0.158          |
| 6         | C      | 0.043           |
| 7         | C      | -0.226          |
| 8         | C      | 0.057           |
| 9         | C      | -0.230          |
| 10        | C      | -0.226          |
| 11        | C      | 0.056           |
| 12        | C      | -0.230          |
| 13        | C      | -0.061          |
| 14        | C      | -0.298          |
| 15        | S      | 0.338           |
| 16        | C      | -0.061          |
| 17        | C      | -0.297          |
| 18        | S      | 0.389           |
| 19        | C      | 0.089           |
| 20        | C      | 0.096           |
| 21        | C      | 0.088           |
| 22        | C      | 0.096           |
| 23        | C      | 0.203           |
| 24        | C      | 0.203           |
| 25        | C      | -0.242          |
| 26        | C      | 0.336           |
| 27        | C      | 0.089           |
| 28        | C      | 0.185           |
| 29        | C      | 0.127           |
| 30        | C      | -0.241          |
| 31        | C      | 0.334           |

|    |   |             |
|----|---|-------------|
| 32 | C | 0.0958      |
| 33 | C | 0.187       |
| 34 | C | 0.187       |
| 35 | N | -0.603      |
| 36 | S | 0.639       |
| 37 | N | -0.594      |
| 38 | N | -0.6060.641 |
| 39 | S | -0.595      |
| 40 | N | -0.144      |
| 41 | C | -0.159      |
| 42 | C | 0.089       |
| 43 | C | 0.159       |
| 44 | C | -0.140      |
| 45 | C | -0.3140     |
| 46 | C | -0.144      |
| 47 | C | -0.161      |
| 48 | C | 0.089       |
| 49 | C | -0.159      |
| 50 | C | -0.145      |
| 51 | C | -0.145      |
| 52 | C | -.158       |
| 53 | C | 0.88        |
| 54 | C | -0.162      |
| 55 | C | -0.145      |
| 56 | C | -0.143      |
| 57 | C | -0.160      |
| 58 | C | 0.089       |
| 59 | C | -0.158      |
| 60 | C | -0.140      |
| 61 | C | -0.450      |
| 62 | C | -0.450      |
| 63 | C | -0.450      |
| 64 | C | -0.450      |
| 65 | C | -0.237      |
| 66 | C | -0.242      |
| 67 | C | -0.101      |
| 68 | C | -0.199      |
| 69 | C | -0.202      |
| 70 | S | 0.223       |
| 71 | C | -0.118      |
| 72 | C | -0.170      |
| 73 | C | -0.255      |
| 74 | S | 0.419       |
| 75 | C | -0.093      |
| 76 | C | -0.168      |

|     |   |        |
|-----|---|--------|
| 77  | H | 0.150  |
| 78  | H | 0.149  |
| 79  | H | 0.149  |
| 80  | H | 0.148  |
| 81  | H | 0.159  |
| 82  | H | 0.159  |
| 83  | H | 0.133  |
| 84  | H | 0.124  |
| 85  | H | 0.124  |
| 86  | H | 0.133  |
| 87  | H | 0.136  |
| 88  | H | 0.124  |
| 89  | H | 0.124  |
| 90  | H | 0.135  |
| 91  | H | 0.135  |
| 92  | H | 0.124  |
| 93  | H | 0.125  |
| 94  | H | 0.137  |
| 95  | H | 0.132  |
| 96  | H | 0.125  |
| 97  | H | 0.124  |
| 98  | H | 0.132  |
| 99  | H | 0.159  |
| 100 | H | 0.147  |
| 101 | H | 0.145  |
| 102 | H | 0.148  |
| 103 | H | 0.144  |
| 104 | H | 0.159  |
| 105 | H | 0.158  |
| 106 | H | 0.145  |
| 107 | H | 0.146  |
| 108 | H | 0.158  |
| 109 | H | 0.146  |
| 110 | H | 0.145  |
| 111 | H | 0.168  |
| 112 | H | 0.160  |
| 113 | H | 0.166  |
| 114 | H | 0.203  |
| 115 | H | 0.181  |
| 116 | F | -0.283 |
| 117 | F | -0.285 |
| 118 | C | -0.082 |
| 119 | C | 0.093  |
| 120 | C | 0.033  |
| 121 | C | -0.017 |

|     |   |        |
|-----|---|--------|
| 122 | C | 0.411  |
| 123 | O | -0.499 |
| 124 | C | 0.045  |
| 125 | C | 0.328  |
| 126 | N | -0.503 |
| 127 | C | 0.327  |
| 128 | N | -0.504 |
| 129 | C | -0.117 |
| 130 | C | 0.094  |
| 131 | C | 0.104  |
| 132 | C | -0.110 |
| 133 | H | 0.208  |
| 134 | H | 0.195  |
| 135 | C | -0.081 |
| 136 | C | 0.105  |
| 137 | C | 0.016  |
| 138 | C | 0.009  |
| 139 | C | 0.388  |
| 140 | O | -0.477 |
| 141 | C | 0.040  |
| 142 | C | 0.329  |
| 143 | N | -0.502 |
| 144 | C | 0.332  |
| 145 | N | -0.485 |
| 146 | C | -0.121 |
| 147 | C | 0.096  |
| 148 | C | 0.102  |
| 149 | C | -0.110 |
| 150 | H | 0.205  |
| 151 | H | 0.197  |
| 152 | H | 0.161  |
| 153 | C | 0.277  |
| 154 | N | -0.469 |
| 155 | C | 0.276  |
| 156 | N | -0.471 |
| 157 | C | 0.276  |
| 158 | N | -0.471 |
| 159 | C | 0.274  |
| 160 | N | -0.474 |

**Reference Molecule R**

| Serial No | Symbol | Mullikan Charge |
|-----------|--------|-----------------|
| 1         | C      | 0.75            |
| 2         | C      | -0.159          |

|    |   |        |
|----|---|--------|
| 3  | C | 0.042  |
| 4  | C | 0.075  |
| 5  | C | -0.159 |
| 6  | C | 0.042  |
| 7  | C | -0.226 |
| 8  | C | 0.056  |
| 9  | C | -0.232 |
| 10 | C | -0.227 |
| 11 | C | 0.056  |
| 12 | C | -0.32  |
| 13 | C | -0.064 |
| 14 | C | -0.297 |
| 15 | S | 0.383  |
| 16 | C | -0.064 |
| 17 | C | -0.297 |
| 18 | S | 0.383  |
| 19 | C | 0.089  |
| 20 | C | 0.095  |
| 21 | C | 0.089  |
| 22 | C | 0.095  |
| 23 | C | 0.200  |
| 24 | C | 0.200  |
| 25 | C | -0.242 |
| 26 | C | 0.327  |
| 27 | C | 0.105  |
| 28 | C | 0.179  |
| 29 | C | 0.186  |
| 30 | C | -0.242 |
| 31 | C | 0.327  |
| 32 | C | 0.105  |
| 33 | C | 0.179  |
| 34 | C | 0.186  |
| 35 | N | -0.605 |
| 36 | S | 0.639  |
| 37 | N | -0.595 |
| 38 | N | -0.605 |
| 39 | S | 0.639  |
| 40 | N | -0.595 |
| 41 | C | -0.143 |
| 42 | C | -0.159 |
| 43 | C | 0.089  |
| 44 | C | -0.160 |
| 45 | C | -0.140 |
| 46 | C | -0.143 |
| 47 | C | -0.161 |



|    |   |        |
|----|---|--------|
| 48 | C | 0.089  |
| 49 | C | -0.160 |
| 50 | C | -0.145 |
| 51 | C | -0.145 |
| 52 | C | -0.160 |
| 53 | C | 0.089  |
| 54 | C | -0.161 |
| 55 | C | -0.144 |
| 56 | C | -0.143 |
| 57 | C | -0.159 |
| 58 | C | 0.089  |
| 59 | C | -0.160 |
| 60 | C | -0.140 |
| 61 | C | -0.450 |
| 62 | C | -0.450 |
| 63 | C | -0.450 |
| 64 | C | -0.450 |
| 65 | C | -0.270 |
| 66 | C | -0.276 |
| 67 | C | -0.110 |
| 68 | C | -0.108 |
| 69 | C | -0.245 |
| 70 | S | 0.427  |
| 71 | C | -0.110 |
| 72 | C | -0.108 |
| 73 | C | -0.245 |
| 74 | S | 0.427  |
| 75 | C | -0.058 |
| 76 | C | -0.058 |
| 77 | C | -0.322 |
| 78 | C | -0.322 |
| 79 | C | 0.679  |
| 80 | C | 0.123  |
| 81 | C | 0.679  |
| 82 | C | 0.123  |
| 83 | H | 0.148  |
| 84 | H | 0.148  |
| 85 | H | 0.145  |
| 86 | H | 0.145  |
| 87 | H | 0.156  |
| 88 | H | 0.156  |
| 89 | H | 0.133  |
| 90 | H | 0.123  |
| 91 | H | 0.122  |
| 92 | H | 0.132  |

|            |          |               |
|------------|----------|---------------|
| <b>93</b>  | <b>H</b> | <b>0.136</b>  |
| <b>94</b>  | <b>H</b> | <b>0.1247</b> |
| <b>95</b>  | <b>H</b> | <b>0.123</b>  |
| <b>96</b>  | <b>H</b> | <b>0.136</b>  |
| <b>97</b>  | <b>H</b> | <b>0.136</b>  |
| <b>98</b>  | <b>H</b> | <b>0.123</b>  |
| <b>99</b>  | <b>H</b> | <b>0.124</b>  |
| <b>100</b> | <b>H</b> | <b>0.136</b>  |
| <b>101</b> | <b>H</b> | <b>0.133</b>  |
| <b>102</b> | <b>H</b> | <b>0.123</b>  |
| <b>103</b> | <b>H</b> | <b>0.122</b>  |
| <b>104</b> | <b>H</b> | <b>0.132</b>  |
| <b>105</b> | <b>H</b> | <b>0.158</b>  |
| <b>106</b> | <b>H</b> | <b>0.144</b>  |
| <b>107</b> | <b>H</b> | <b>0.144</b>  |
| <b>108</b> | <b>H</b> | <b>0.144</b>  |
| <b>109</b> | <b>H</b> | <b>0.144</b>  |
| <b>110</b> | <b>H</b> | <b>0.158</b>  |
| <b>111</b> | <b>H</b> | <b>0.156</b>  |
| <b>112</b> | <b>H</b> | <b>0.147</b>  |
| <b>113</b> | <b>H</b> | <b>0.143</b>  |
| <b>114</b> | <b>H</b> | <b>0.156</b>  |
| <b>115</b> | <b>H</b> | <b>0.147</b>  |
| <b>116</b> | <b>H</b> | <b>0.143</b>  |
| <b>117</b> | <b>H</b> | <b>0.161</b>  |
| <b>118</b> | <b>H</b> | <b>0.151</b>  |
| <b>119</b> | <b>H</b> | <b>0.161</b>  |
| <b>120</b> | <b>H</b> | <b>0.151</b>  |
| <b>121</b> | <b>H</b> | <b>0.187</b>  |
| <b>122</b> | <b>H</b> | <b>0.187</b>  |
| <b>123</b> | <b>F</b> | <b>-0.289</b> |
| <b>124</b> | <b>F</b> | <b>-0.289</b> |
| <b>125</b> | <b>O</b> | <b>-0.499</b> |
| <b>126</b> | <b>O</b> | <b>-0.499</b> |
| <b>127</b> | <b>N</b> | <b>-0.588</b> |
| <b>128</b> | <b>N</b> | <b>-0.588</b> |
| <b>129</b> | <b>C</b> | <b>-0.276</b> |
| <b>130</b> | <b>C</b> | <b>-0.276</b> |
| <b>131</b> | <b>H</b> | <b>0.188</b>  |
| <b>132</b> | <b>H</b> | <b>0.196</b>  |
| <b>133</b> | <b>H</b> | <b>0.188</b>  |
| <b>134</b> | <b>H</b> | <b>0.196</b>  |
| <b>135</b> | <b>H</b> | <b>0.188</b>  |
| <b>136</b> | <b>H</b> | <b>0.188</b>  |
| <b>137</b> | <b>C</b> | <b>0.130</b>  |

|     |   |        |
|-----|---|--------|
| 138 | C | 0.130  |
| 139 | C | 0.301  |
| 140 | N | 0.496  |
| 141 | C | 0.331  |
| 142 | N | -0.508 |
| 143 | C | 0.331  |
| 144 | N | -0.509 |
| 145 | C | 0.301  |
| 146 | N | -0.496 |
| 147 | S | 0.410  |
| 148 | S | 0.410  |

### Cartesian coordinates

#### Reference R

| Symbol | X          | Y          | Z          |
|--------|------------|------------|------------|
| C      | 1.3701840  | -0.1386610 | -0.0570230 |
| C      | 0.8373930  | 1.1539270  | -0.0546660 |
| C      | -0.5388700 | 1.2845030  | -0.0626110 |
| C      | -1.3701830 | 0.1386970  | -0.0573790 |
| C      | -0.8373950 | -1.1538910 | -0.0549640 |
| C      | 0.5388690  | -1.2844670 | -0.0625410 |
| C      | 1.3683960  | -2.5783110 | -0.0300410 |
| C      | 2.7719220  | -1.9933530 | -0.0012870 |
| C      | 2.7315310  | -0.6149080 | -0.0326970 |
| C      | -1.3684040 | 2.5783390  | -0.0302370 |
| C      | -2.7719420 | 1.9933800  | -0.0018060 |
| C      | -2.7315360 | 0.6149380  | -0.0333210 |
| C      | -4.0775730 | 2.4973680  | 0.0090780  |
| C      | -5.0406330 | 1.4956360  | -0.0063070 |
| S      | -4.2910400 | -0.0946930 | -0.0430850 |
| C      | 4.0775430  | -2.4973610 | 0.0097220  |
| C      | 5.0406160  | -1.4956390 | -0.0054530 |
| S      | 4.2910460  | 0.0947040  | -0.0422190 |

|   |            |            |            |
|---|------------|------------|------------|
| C | 1.2299290  | -3.4281330 | -1.2998590 |
| C | 1.0061240  | -3.3572490 | 1.2400910  |
| C | -1.2296400 | 3.4282490  | -1.2999600 |
| C | -1.0064190 | 3.3572440  | 1.2400010  |
| C | -6.4734210 | 1.6841410  | 0.0014100  |
| C | 6.4734020  | -1.6841600 | 0.0024470  |
| C | -7.0528520 | 2.9416980  | 0.0144290  |
| C | -8.4411280 | 3.1460780  | 0.0224880  |
| C | -9.4100250 | 2.1534800  | 0.0184410  |
| C | -8.8433000 | 0.8359520  | 0.0044500  |
| C | -7.4159750 | 0.6010080  | -0.0040010 |
| C | 7.0528140  | -2.9417210 | 0.0158390  |
| C | 8.4410870  | -3.1461190 | 0.0239760  |
| C | 9.4099980  | -2.1535350 | 0.0196810  |
| C | 8.8432920  | -0.8360020 | 0.0053450  |
| C | 7.4159710  | -0.6010410 | -0.0031970 |
| N | -9.5511990 | -0.2893040 | -0.0021220 |
| S | -8.4937840 | -1.5270810 | -0.0178870 |
| N | -7.1005110 | -0.6897630 | -0.0166720 |
| N | 9.5512060  | 0.2892420  | -0.0014970 |
| S | 8.4938090  | 1.5270290  | -0.0175950 |
| N | 7.1005240  | 0.6897310  | -0.0161970 |
| C | 0.7222050  | -2.9087960 | -2.4903140 |
| C | 0.6918290  | -3.6784990 | -3.6493080 |
| C | 1.1667900  | -4.9897810 | -3.6638880 |
| C | 1.6822210  | -5.5042110 | -2.4712830 |
| C | 1.7136750  | -4.7405940 | -1.3119910 |
| C | -0.0684360 | -4.2521990 | 1.2412460  |
| C | -0.4553780 | -4.9018460 | 2.4064280  |

|   |             |            |            |
|---|-------------|------------|------------|
| C | 0.2146670   | -4.6866010 | 3.6133350  |
| C | 1.2820400   | -3.7882220 | 3.6088440  |
| C | 1.6719770   | -3.1331120 | 2.4452670  |
| C | -1.6723860  | 3.1328890  | 2.4450740  |
| C | -1.2827240  | 3.7879920  | 3.6087470  |
| C | -0.2155250  | 4.6865780  | 3.6134360  |
| C | 0.4546360   | 4.9020350  | 2.4066320  |
| C | 0.0679700   | 4.2523950  | 1.2413530  |
| C | -0.7210010  | 2.9093250  | -2.4901380 |
| C | -0.6902980  | 3.6792460  | -3.6490510 |
| C | -1.1658540  | 4.9902450  | -3.6637460 |
| C | -1.6822260  | 5.5043120  | -2.4713180 |
| C | -1.7139810  | 4.7405500  | -1.3121990 |
| C | 1.1016350   | -5.8305160 | -4.9081970 |
| C | -1.1006340  | 5.8313810  | -4.9077780 |
| C | 0.1845850   | 5.4185510  | 4.8638550  |
| C | -0.1857410  | -5.4185820 | 4.8636540  |
| C | -10.8359300 | 2.4044930  | 0.0268470  |
| C | 10.8359000  | -2.4045660 | 0.0281370  |
| C | 11.4941100  | -3.6308560 | 0.0397180  |
| C | 12.8866500  | -3.5177770 | 0.0454500  |
| C | 13.3352410  | -2.2056070 | 0.0386800  |
| S | 11.9924580  | -1.1016100 | 0.0245490  |
| C | -11.4941580 | 3.6307780  | 0.0379090  |
| C | -12.8866960 | 3.5176810  | 0.0438210  |
| C | -13.3352670 | 2.2055000  | 0.0377150  |
| S | -11.9924680 | 1.1015180  | 0.0239530  |
| C | 14.7016980  | -1.8098950 | 0.0424630  |
| C | -14.7017180 | 1.8097700  | 0.0418270  |

|   |             |            |            |
|---|-------------|------------|------------|
| C | 15.2648660  | -0.5762260 | 0.0379580  |
| C | -15.2648670 | 0.5760890  | 0.0379750  |
| C | 16.7237670  | -0.4270740 | 0.0434830  |
| C | 16.0282100  | 1.8121420  | 0.0285980  |
| C | -16.7237650 | 0.4269170  | 0.0437500  |
| C | -16.0281760 | -1.8122950 | 0.0298670  |
| H | 1.4835290   | 2.0246460  | -0.0349420 |
| H | -1.4835370  | -2.0246100 | -0.0354770 |
| H | -4.3188960  | 3.5517870  | 0.0238260  |
| H | 4.3188370   | -3.5517890 | 0.0243480  |
| H | -6.4477850  | 3.8386460  | 0.0173200  |
| H | 6.4477350   | -3.8386600 | 0.0189840  |
| H | 0.3481950   | -1.8917710 | -2.5189890 |
| H | 0.2891350   | -3.2467180 | -4.5608700 |
| H | 2.0635810   | -6.5210010 | -2.4486230 |
| H | 2.1079270   | -5.1745220 | -0.3988100 |
| H | -0.6007910  | -4.4540650 | 0.3177080  |
| H | -1.2934430  | -5.5921050 | 2.3761090  |
| H | 1.8201920   | -3.5942500 | 4.5320180  |
| H | 2.5020180   | -2.4359970 | 2.4798150  |
| H | -2.5022990  | 2.4356140  | 2.4794600  |
| H | -1.8209560  | 3.5938540  | 4.5318390  |
| H | 1.2925720   | 5.5924580  | 2.3764710  |
| H | 0.6004100   | 4.4544160  | 0.3178980  |
| H | -0.3464750  | 1.8924900  | -2.5187550 |
| H | -0.2868320  | 3.2477970  | -4.5604220 |
| H | -2.0640620  | 6.5209310  | -2.4487280 |
| H | -2.1088890  | 5.1741770  | -0.3991580 |
| H | 0.1765340   | -6.4159510 | -4.9401230 |

|   |             |            |            |
|---|-------------|------------|------------|
| H | 1.9338380   | -6.5366160 | -4.9569470 |
| H | 1.1276910   | -5.2136090 | -5.8090720 |
| H | -1.9403530  | 6.5281010  | -4.9630740 |
| H | -1.1129380  | 5.2140600  | -5.8086230 |
| H | -0.1820500  | 6.4273130  | -4.9327210 |
| H | -0.2554160  | 6.4211030  | 4.8917840  |
| H | 1.2687640   | 5.5396730  | 4.9260300  |
| H | -0.1487320  | 4.8903070  | 5.7595920  |
| H | 0.2542610   | -6.4211320 | 4.8916840  |
| H | -1.2699330  | -5.5397090 | 4.9255690  |
| H | 0.1473610   | -4.8903420 | 5.7594740  |
| H | 10.9722350  | -4.5739240 | 0.0436540  |
| H | 13.5620370  | -4.3644890 | 0.0543180  |
| H | -10.9722980 | 4.5738560  | 0.0413460  |
| H | -13.5620950 | 4.3643860  | 0.0523520  |
| H | 15.4283350  | -2.6197720 | 0.0503570  |
| H | -15.4283670 | 2.6196380  | 0.0494180  |
| F | -8.8129690  | 4.4343350  | 0.0348310  |
| F | 8.8129110   | -4.4343760 | 0.0366630  |
| O | 17.5482760  | -1.3164710 | 0.0518910  |
| O | -17.5482870 | 1.3163060  | 0.0518270  |
| N | 17.0690210  | 0.9391130  | 0.0376250  |
| N | -17.0689990 | -0.9392770 | 0.0386020  |
| C | -18.4774310 | -1.3064580 | 0.0430580  |
| C | 18.4774600  | 1.3062740  | 0.0416830  |
| H | 18.7211350  | 1.8890490  | 0.9294590  |
| H | 19.0314830  | 0.3689690  | 0.0486540  |
| H | 18.7285210  | 1.8802120  | -0.8497790 |
| H | -19.0314670 | -0.3691580 | 0.0497120  |

|   |             |            |            |
|---|-------------|------------|------------|
| H | -18.7286380 | -1.8807910 | -0.8481080 |
| H | -18.7209440 | -1.8888480 | 0.9311320  |
| C | -16.0672530 | -3.1932550 | 0.0235770  |
| C | 16.0673080  | 3.1930990  | 0.0216310  |
| C | 14.8329070  | 3.9008900  | 0.0127450  |
| N | 13.8137770  | 4.4604460  | 0.0056240  |
| C | 17.2505100  | 3.9793780  | 0.0227370  |
| N | 18.1910970  | 4.6629910  | 0.0233450  |
| C | -17.2504420 | -3.9795520 | 0.0251840  |
| N | -18.1910190 | -4.6631790 | 0.0262150  |
| C | -14.8328420 | -3.9010320 | 0.0149020  |
| N | -13.8137040 | -4.4605750 | 0.0079420  |
| S | 14.4762190  | 0.9890910  | 0.0260910  |
| S | -14.4761970 | -0.9892210 | 0.0267630  |

**Molecule A1**

| <b>Symbol</b> | <b>X</b>   | <b>Y</b>   | <b>Z</b>   |
|---------------|------------|------------|------------|
| C             | 1.7231660  | 0.5451660  | 0.0064040  |
| C             | 1.0934560  | -0.7025090 | 0.0477150  |
| C             | -0.2888740 | -0.7275230 | 0.0493410  |
| C             | -1.0295490 | 0.4774420  | -0.0111970 |
| C             | -0.3999050 | 1.7247570  | -0.0602550 |
| C             | 0.9820770  | 1.7505140  | -0.0406290 |
| C             | 1.9076590  | 2.9759070  | -0.1037230 |
| C             | 3.2628750  | 2.2854110  | -0.0912060 |
| C             | 3.1168340  | 0.9153550  | -0.0150450 |
| C             | -1.2149050 | -1.9539260 | 0.0734710  |
| C             | -2.5695700 | -1.2650810 | 0.0070390  |
| C             | -2.4228990 | 0.1068000  | -0.0245670 |
| C             | -3.9098640 | -1.6657070 | 0.0130030  |



|   |            |            |            |
|---|------------|------------|------------|
| C | -4.7927550 | -0.5925200 | -0.0215730 |
| S | -3.9221580 | 0.9351950  | -0.0518300 |
| C | 4.6028830  | 2.6874230  | -0.0983100 |
| C | 5.4862830  | 1.6162730  | -0.0346310 |
| S | 4.6168790  | 0.0895500  | 0.0407200  |
| C | 1.8175820  | 3.8770150  | 1.1344530  |
| C | 1.6234970  | 3.7350540  | -1.4055910 |
| C | -1.1461270 | -2.7481440 | 1.3844370  |
| C | -0.9114190 | -2.8216080 | -1.1540430 |
| C | -6.2346290 | -0.6716930 | -0.0306890 |
| C | 6.9284600  | 1.6969440  | -0.0198900 |
| C | -6.9086990 | -1.8816180 | -0.0224010 |
| C | -8.3082820 | -1.9795730 | -0.0259290 |
| C | -9.1993770 | -0.9149920 | -0.0394610 |
| C | -8.5330050 | 0.3559060  | -0.0508550 |
| C | -7.0919130 | 0.4805420  | -0.0468160 |
| C | 7.6009350  | 2.9073310  | -0.0386520 |
| C | 9.0002510  | 3.0065030  | -0.0228060 |
| C | 9.8923910  | 1.9437400  | 0.0149850  |
| C | 9.2279160  | 0.6718760  | 0.0297280  |
| C | 7.7867570  | 0.5462400  | 0.0153490  |
| N | -9.1520280 | 1.5319400  | -0.0661580 |
| S | -8.0018630 | 2.6843110  | -0.0746500 |
| N | -6.6769220 | 1.7424620  | -0.0592650 |
| N | 9.8470950  | -0.5041240 | 0.0578380  |
| S | 8.6971460  | -1.6566330 | 0.0713670  |
| N | 7.3723280  | -0.7158180 | 0.0360930  |
| C | 1.2407720  | 3.4473440  | 2.3286830  |
| C | 1.2551820  | 4.2576300  | 3.4606250  |

|   |             |            |            |
|---|-------------|------------|------------|
| C | 1.8449960   | 5.5208090  | 3.4426830  |
| C | 2.4281720   | 5.9457880  | 2.2454180  |
| C | 2.4153110   | 5.1421280  | 1.1137430  |
| C | 0.6332840   | 4.7202870  | -1.4527130 |
| C | 0.3135330   | 5.3544830  | -2.6472540 |
| C | 0.9696040   | 5.0326980  | -3.8372590 |
| C | 1.9534360   | 4.0438760  | -3.7865130 |
| C | 2.2755130   | 3.4046360  | -2.5945280 |
| C | -1.5401170  | -2.5912190 | -2.3786770 |
| C | -1.1992420  | -3.3301720 | -3.5059230 |
| C | -0.2189600  | -4.3226500 | -3.4542800 |
| C | 0.4133700   | -4.5446430 | -2.2292680 |
| C | 0.0745250   | -3.8106350 | -1.0987800 |
| C | -0.5757060  | -2.2262510 | 2.5442770  |
| C | -0.6074390  | -2.9404800 | 3.7390520  |
| C | -1.2087490  | -4.1955280 | 3.8201300  |
| C | -1.7858480  | -4.7129880 | 2.6565640  |
| C | -1.7554160  | -4.0056640 | 1.4628610  |
| C | 1.8337130   | 6.4074190  | 4.6563790  |
| C | -1.2158560  | -4.9795580 | 5.1025220  |
| C | 0.1232200   | -5.1424170 | -4.6668350 |
| C | 0.6475920   | 5.7462760  | -5.1204450 |
| C | -10.6398200 | -1.0533740 | -0.0418950 |
| C | 11.3318490  | 2.0891830  | 0.0489070  |
| C | 12.0719330  | 3.2718630  | 0.0586060  |
| C | 13.4482510  | 3.0592660  | 0.0752600  |
| C | 13.8070090  | 1.7154360  | 0.1121080  |
| S | 12.3891250  | 0.7116440  | 0.0848260  |
| C | -11.3855680 | -2.2364940 | -0.0312340 |

|   |             |            |            |
|---|-------------|------------|------------|
| C | -12.7633850 | -2.0406630 | -0.0358890 |
| C | -13.1253340 | -0.6947260 | -0.0504470 |
| S | -11.6958860 | 0.3162750  | -0.0586100 |
| C | 15.1485950  | 1.2582440  | 0.0264930  |
| C | -14.3645520 | -0.0041010 | -0.0603170 |
| H | 1.6709070   | -1.6201540 | 0.0702510  |
| H | -0.9771600  | 2.6408820  | -0.1197660 |
| H | -4.2340800  | -2.6970760 | 0.0480290  |
| H | 4.9257160   | 3.7187580  | -0.1447530 |
| H | -6.3749090  | -2.8226860 | -0.0124470 |
| H | 7.0662280   | 3.8476680  | -0.0608740 |
| H | 0.7765580   | 2.4693240  | 2.3830880  |
| H | 0.7968920   | 3.8956740  | 4.3762250  |
| H | 2.8985960   | 6.9236890  | 2.1978870  |
| H | 2.8646090   | 5.5072790  | 0.1958240  |
| H | 0.1149510   | 5.0053020  | -0.5432690 |
| H | -0.4599280  | 6.1169380  | -2.6530270 |
| H | 2.4784610   | 3.7660440  | -4.6957660 |
| H | 3.0408770   | 2.6362370  | -2.5926680 |
| H | -2.3016120  | -1.8229070 | -2.4562520 |
| H | -1.7061460  | -3.1288060 | -4.4451130 |
| H | 1.1831190   | -5.3073530 | -2.1559990 |
| H | 0.5743160   | -4.0194720 | -0.1588470 |
| H | -0.1019080  | -1.2516360 | 2.5217580  |
| H | -0.1526700  | -2.5088070 | 4.6257240  |
| H | -2.2647040  | -5.6875320 | 2.6852520  |
| H | -2.1987650  | -4.4420490 | 0.5735890  |
| H | 1.0244320   | 7.1431250  | 4.5998950  |
| H | 2.7695260   | 6.9632930  | 4.7533000  |

|   |             |            |            |
|---|-------------|------------|------------|
| H | 1.6873260   | 5.8298680  | 5.5714160  |
| H | -2.1676570  | -5.4961690 | 5.2492680  |
| H | -1.0449510  | -4.3338260 | 5.9662530  |
| H | -0.4302260  | -5.7424630 | 5.1023640  |
| H | -0.5183340  | -6.0272650 | -4.7382140 |
| H | 1.1572860   | -5.4925710 | -4.6333460 |
| H | -0.0108220  | -4.5692850 | -5.5870520 |
| H | 1.2761700   | 6.6344200  | -5.2457890 |
| H | -0.3926160  | 6.0788950  | -5.1421300 |
| H | 0.8160200   | 5.1040140  | -5.9877710 |
| H | 11.6174820  | 4.2486810  | 0.0466260  |
| H | 14.1835610  | 3.8545450  | 0.0673840  |
| H | -10.9288220 | -3.2127170 | -0.0202170 |
| H | -13.5016410 | -2.8288080 | -0.0289170 |
| H | 15.8518630  | 2.0334220  | -0.2806690 |
| F | -8.7736530  | -3.2355620 | -0.0157410 |
| F | 9.4652760   | 4.2630050  | -0.0440160 |
| C | -15.6748690 | -0.4266830 | -0.0539380 |
| C | -16.8435440 | 0.4574100  | -0.0660230 |
| C | -18.0496480 | -0.3989610 | -0.0383570 |
| C | -17.6479080 | -1.7382890 | -0.0168060 |
| C | -16.1737730 | -1.8229920 | -0.0270880 |
| O | -15.5453650 | -2.8677670 | -0.0141380 |
| C | -16.8794400 | 1.8349930  | -0.1003620 |
| C | -18.0939560 | 2.5811460  | -0.1084450 |
| N | -19.0610360 | 3.2261050  | -0.1159550 |
| C | -15.7310850 | 2.6785160  | -0.1334590 |
| N | -14.8276870 | 3.4101150  | -0.1616630 |
| C | -19.4133210 | -0.0945550 | -0.0317810 |

|   |             |            |            |
|---|-------------|------------|------------|
| C | -20.3091650 | -1.1498520 | -0.0040890 |
| C | -19.8880780 | -2.4845610 | 0.0165990  |
| C | -18.5417500 | -2.7964430 | 0.0104490  |
| H | -19.8089920 | 0.9110710  | -0.0466220 |
| H | -18.2006410 | -3.8244480 | 0.0264430  |
| C | 15.7423960  | 0.0286390  | 0.1072500  |
| C | 15.3247520  | -1.2866180 | 0.5582700  |
| C | 16.1935660  | -2.2731880 | -0.1193640 |
| C | 17.2543290  | -1.5890500 | -0.7323510 |
| C | 17.0694610  | -0.1303160 | -0.5586210 |
| O | 17.8130510  | 0.7518990  | -0.9375780 |
| C | 14.4723700  | -1.5663180 | 1.6024020  |
| C | 14.1301760  | -2.8971700 | 1.9783870  |
| N | 13.8257650  | -3.9772300 | 2.2815460  |
| C | 13.9775620  | -0.5558030 | 2.4753920  |
| N | 13.6091390  | 0.2398000  | 3.2380630  |
| C | 16.1397750  | -3.6656460 | -0.1814000 |
| C | 17.1534460  | -4.3165380 | -0.8651150 |
| C | 18.2121680  | -3.6226460 | -1.4629280 |
| C | 18.2767200  | -2.2428010 | -1.4016640 |
| H | 15.3511600  | -4.2560760 | 0.2650730  |
| H | 19.0935410  | -1.6988530 | -1.8603710 |
| H | -14.2335020 | 1.0725360  | -0.0746340 |
| F | 17.1391900  | -5.6421490 | -0.9684780 |
| F | -20.8129580 | -3.4391820 | 0.0423760  |
| F | -21.6169750 | -0.9084750 | 0.0035450  |
| F | 19.1489800  | -4.3241150 | -2.0943580 |

Molecule A2

| Symbol | X | Y | Z |
|--------|---|---|---|
|--------|---|---|---|

|   |            |            |            |
|---|------------|------------|------------|
| C | -1.6611590 | 0.3801140  | 0.0657840  |
| C | -1.0197760 | -0.8617320 | 0.0980410  |
| C | 0.3625180  | -0.8746450 | 0.0725040  |
| C | 1.0923410  | 0.3377150  | 0.0371570  |
| C | 0.4510380  | 1.5798780  | 0.0132030  |
| C | -0.9313720 | 1.5922440  | 0.0167320  |
| C | -1.8684920 | 2.8103750  | 0.0086830  |
| C | -3.2167050 | 2.1086510  | 0.0700010  |
| C | -3.0580070 | 0.7382730  | 0.0863900  |
| C | 1.2997440  | -2.0920570 | 0.1158530  |
| C | 2.6487000  | -1.3891040 | 0.1065600  |
| C | 2.4894190  | -0.0197120 | 0.0485340  |
| C | 3.9926300  | -1.7783070 | 0.1051140  |
| C | 4.8657010  | -0.6981410 | 0.0530790  |
| S | 3.9813880  | 0.8210310  | -0.0001510 |
| C | -4.5607890 | 2.4980930  | 0.0672480  |
| C | -5.4341040 | 1.4174280  | 0.0889140  |
| S | -4.5507160 | -0.1029140 | 0.1028940  |
| C | -1.8101630 | 3.6199760  | -1.2932740 |
| C | -1.5695620 | 3.6668140  | 1.2450880  |
| C | 1.2119760  | -2.9785190 | -1.1329910 |
| C | 1.0287710  | -2.8710470 | 1.4088610  |
| C | 6.3086190  | -0.7643260 | 0.0362240  |
| C | -6.8775190 | 1.4844170  | 0.0938030  |
| C | 6.9933730  | -1.9679090 | 0.0338230  |
| C | 8.3940320  | -2.0534540 | 0.0225230  |
| C | 9.2755750  | -0.9813250 | 0.0104070  |
| C | 8.5976370  | 0.2836120  | 0.0089450  |
| C | 7.1553640  | 0.3954130  | 0.0211680  |

|   |            |            |            |
|---|------------|------------|------------|
| C | -7.5607690 | 2.6885130  | 0.1019040  |
| C | -8.9612280 | 2.7751840  | 0.0933460  |
| C | -9.8440910 | 1.7045670  | 0.0775340  |
| C | -9.1680640 | 0.4386260  | 0.0808120  |
| C | -7.7255350 | 0.3259010  | 0.0869090  |
| N | 9.2059200  | 1.4653430  | -0.0035720 |
| S | 8.0455940  | 2.6072390  | -0.0004570 |
| N | 6.7289500  | 1.6536730  | 0.0173710  |
| N | -9.7768010 | -0.7431930 | 0.0785890  |
| S | -8.6168260 | -1.8854000 | 0.0783010  |
| N | -7.2998850 | -0.9326790 | 0.0863670  |
| C | -1.2431800 | 3.1139920  | -2.4618520 |
| C | -1.2859000 | 3.8407230  | -3.6487050 |
| C | -1.8950360 | 5.0929690  | -3.7129090 |
| C | -2.4682990 | 5.5946020  | -2.5406150 |
| C | -2.4270940 | 4.8746850  | -1.3547600 |
| C | -0.5892200 | 4.6619930  | 1.1998040  |
| C | -0.2539290 | 5.3861160  | 2.3376110  |
| C | -0.8845840 | 5.1479370  | 3.5605140  |
| C | -1.8594310 | 4.1497710  | 3.6021140  |
| C | -2.1966730 | 3.4205370  | 2.4673620  |
| C | 1.6806010  | -2.5478390 | 2.5999090  |
| C | 1.3699190  | -3.2058160 | 3.7846650  |
| C | 0.3979180  | -4.2067270 | 3.8258650  |
| C | -0.2579150 | -4.5214450 | 2.6338890  |
| C | 0.0506740  | -3.8686410 | 1.4464250  |
| C | 0.6163730  | -2.5442200 | -2.3162020 |
| C | 0.6313110  | -3.3414410 | -3.4575240 |
| C | 1.2401940  | -4.5955620 | -3.4601220 |

|   |             |            |            |
|---|-------------|------------|------------|
| C | 1.8422220   | -5.0251930 | -2.2738110 |
| C | 1.8288160   | -4.2347130 | -1.1330020 |
| C | -1.9149380  | 5.8902370  | -4.9870090 |
| C | 1.2292750   | -5.4687080 | -4.6835880 |
| C | 0.0881750   | -4.9398540 | 5.1010590  |
| C | -0.5461060  | 5.9571080  | 4.7812350  |
| C | 10.7176120  | -1.1070070 | 0.0008410  |
| C | -11.2853410 | 1.8370840  | 0.0474940  |
| C | -12.0351830 | 3.0127840  | 0.0302640  |
| C | -13.4102820 | 2.7881950  | 0.0152870  |
| C | -13.7572840 | 1.4418140  | -0.0125880 |
| S | -12.3315320 | 0.4504370  | 0.0222220  |
| C | 11.4737890  | -2.2827840 | -0.0061460 |
| C | 12.8505010  | -2.0743730 | -0.0123280 |
| C | 13.1999100  | -0.7257650 | -0.0100790 |
| S | 11.7619250  | 0.2721580  | -0.0002280 |
| C | -15.0967220 | 0.9738730  | 0.0726270  |
| C | 14.4338940  | -0.0229500 | -0.0092040 |
| H | -1.5884420  | -1.7837630 | 0.1486540  |
| H | 1.0200940   | 2.5029350  | -0.0008030 |
| H | 4.3258060   | -2.8068650 | 0.1390140  |
| H | -4.8937060  | 3.5269420  | 0.0411980  |
| H | 6.4678590   | -2.9137030 | 0.0376780  |
| H | -7.0345000  | 3.6338360  | 0.1118980  |
| H | -0.7640400  | 2.1417590  | -2.4524770 |
| H | -0.8342160  | 3.4209800  | -4.5426620 |
| H | -2.9532880  | 6.5664140  | -2.5562460 |
| H | -2.8685850  | 5.2986310  | -0.4585890 |
| H | -0.0911170  | 4.8833170  | 0.2618180  |



|   |             |            |            |
|---|-------------|------------|------------|
| H | 0.5116660   | 6.1537150  | 2.2720650  |
| H | -2.3649260  | 3.9360290  | 4.5393380  |
| H | -2.9540580  | 2.6474210  | 2.5369050  |
| H | 2.4367230   | -1.7703770 | 2.6054170  |
| H | 1.8944930   | -2.9332280 | 4.6957660  |
| H | -1.0223390  | -5.2930000 | 2.6323640  |
| H | -0.4668950  | -4.1482940 | 0.5349040  |
| H | 0.1361580   | -1.5731980 | -2.3543450 |
| H | 0.1575080   | -2.9764660 | -4.3639830 |
| H | 2.3275860   | -5.9964330 | -2.2422190 |
| H | 2.2924750   | -4.6036570 | -0.2237450 |
| H | -1.1361710  | 6.6601660  | -4.9826110 |
| H | -2.8720330  | 6.3996870  | -5.1240840 |
| H | -1.7425330  | 5.2549610  | -5.8581730 |
| H | 2.1745840   | -6.0044730 | -4.8001210 |
| H | 1.0580290   | -4.8840760 | -5.5897810 |
| H | 0.4358440   | -6.2212270 | -4.6240400 |
| H | 0.7277390   | -5.8218250 | 5.2139440  |
| H | -0.9479180  | -5.2852130 | 5.1214040  |
| H | 0.2512980   | -4.3062220 | 5.9757330  |
| H | -1.1859680  | 6.8428380  | 4.8569690  |
| H | 0.4888780   | 6.3052770  | 4.7551640  |
| H | -0.6853270  | 5.3767880  | 5.6961460  |
| H | -11.5893390 | 3.9936300  | 0.0355560  |
| H | -14.1524050 | 3.5771390  | 0.0179220  |
| H | 11.0260610  | -3.2632710 | -0.0064700 |
| H | 13.5967570  | -2.8550580 | -0.0187690 |
| H | -15.8065360 | 1.7455490  | 0.3738780  |
| F | 8.8701740   | -3.3057060 | 0.0234370  |

|   |             |            |            |
|---|-------------|------------|------------|
| F | -9.4366430  | 4.0282500  | 0.0995360  |
| C | 15.7469830  | -0.4332650 | -0.0270480 |
| C | 16.9087300  | 0.4611240  | -0.0201930 |
| C | 18.1224040  | -0.3831710 | -0.0976470 |
| C | 17.7327630  | -1.7274760 | -0.1281950 |
| C | 16.2602180  | -1.8256120 | -0.0799200 |
| O | 15.6365040  | -2.8736620 | -0.0879220 |
| C | 16.9296210  | 1.8375040  | 0.0569900  |
| C | 18.1324190  | 2.6031040  | 0.0558200  |
| N | 19.0833540  | 3.2717390  | 0.0577610  |
| C | 15.7730550  | 2.6652060  | 0.1535910  |
| N | 14.8631440  | 3.3848150  | 0.2349030  |
| C | 19.4827980  | -0.0706900 | -0.1392920 |
| C | 20.4021590  | -1.1156860 | -0.2087930 |
| C | 19.9959830  | -2.4514010 | -0.2362850 |
| C | 18.6420650  | -2.7692630 | -0.1957700 |
| H | 19.8404290  | 0.9487110  | -0.1205410 |
| H | 21.4600820  | -0.8795480 | -0.2422540 |
| H | 20.7399440  | -3.2385780 | -0.2897730 |
| H | 18.2869120  | -3.7933850 | -0.2159350 |
| C | -15.6815000 | -0.2588100 | -0.0039640 |
| C | -15.2546370 | -1.5767070 | -0.4405910 |
| C | -16.1186760 | -2.5626130 | 0.2457570  |
| C | -17.1910100 | -1.8791970 | 0.8429720  |
| C | -17.0149820 | -0.4213610 | 0.6531000  |
| O | -17.7645520 | 0.4641390  | 1.0131650  |
| C | -14.4018210 | -1.8576970 | -1.4839900 |
| C | -14.0541290 | -3.1878520 | -1.8588360 |
| N | -13.7411650 | -4.2638380 | -2.1676650 |

|   |             |            |            |
|---|-------------|------------|------------|
| C | -13.9115820 | -0.8491160 | -2.3621940 |
| N | -13.5456950 | -0.0560040 | -3.1287580 |
| C | -16.0535580 | -3.9521860 | 0.3361230  |
| C | -17.0683450 | -4.6176320 | 1.0222160  |
| C | -18.1379890 | -3.9286920 | 1.5981330  |
| C | -18.2075420 | -2.5410570 | 1.5109430  |
| H | -15.2394290 | -4.5146910 | -0.1006300 |
| H | -17.0231420 | -5.6978260 | 1.1074720  |
| H | -18.9138740 | -4.4804460 | 2.1172720  |
| H | -19.0233220 | -1.9768500 | 1.9485730  |
| H | 14.2921240  | 1.0523110  | 0.0062930  |

Molecule A3

| Symbol | X          | Y          | Z          |
|--------|------------|------------|------------|
| C      | -1.2650710 | 0.2600760  | 0.0107670  |
| C      | -0.6004760 | 1.4900950  | 0.0055620  |
| C      | 0.7819530  | 1.4765030  | 0.0174190  |
| C      | 1.4891110  | 0.2502230  | 0.0108080  |
| C      | 0.8245010  | -0.9797640 | 0.0083300  |
| C      | -0.5579960 | -0.9661510 | 0.0201190  |
| C      | -1.5177760 | -2.1664850 | 0.0071690  |
| C      | -2.8531230 | -1.4385510 | -0.0237900 |
| C      | -2.6685910 | -0.0714380 | -0.0063130 |
| C      | 1.7417580  | 2.6767500  | 0.0015630  |
| C      | 3.0770470  | 1.9486620  | -0.0274960 |
| C      | 2.8926830  | 0.5816970  | -0.0069650 |
| C      | 4.4283810  | 2.3128830  | -0.0284190 |
| C      | 5.2812680  | 1.2159950  | -0.0161170 |
| S      | 4.3694130  | -0.2873740 | 0.0057520  |
| C      | -4.2043380 | -1.8026130 | -0.0236680 |

|   |            |            |            |
|---|------------|------------|------------|
| C | -5.0572500 | -0.7055510 | -0.0136850 |
| S | -4.1451030 | 0.7977600  | 0.0049590  |
| C | -1.4617610 | -3.0090580 | 1.2880630  |
| C | -1.2466600 | -2.9976220 | -1.2526870 |
| C | 1.6854400  | 3.5227010  | 1.2802020  |
| C | 1.4706760  | 3.5045120  | -1.2605600 |
| C | 6.7259620  | 1.2552650  | -0.0176580 |
| C | -6.5016700 | -0.7446990 | -0.0153350 |
| C | 7.4322320  | 2.4454190  | -0.0301290 |
| C | 8.8345840  | 2.5051670  | -0.0307220 |
| C | 9.6987460  | 1.4189460  | -0.0197050 |
| C | 8.9967930  | 0.1660280  | -0.0068570 |
| C | 7.5517630  | 0.0810570  | -0.0056680 |
| C | -7.2082980 | -1.9351350 | -0.0285420 |
| C | -8.6105830 | -1.9950700 | -0.0288010 |
| C | -9.4722990 | -0.9074790 | -0.0169000 |
| C | -8.7714070 | 0.3446820  | -0.0034140 |
| C | -7.3271080 | 0.4301440  | -0.0025210 |
| N | 9.5814220  | -1.0275520 | 0.0052280  |
| S | 8.4003910  | -2.1463760 | 0.0170920  |
| N | 7.1008930  | -1.1686310 | 0.0072630  |
| N | -9.3580650 | 1.5374050  | 0.0095510  |
| S | -8.1770330 | 2.6577880  | 0.0218000  |
| N | -6.8778050 | 1.6804120  | 0.0110600  |
| C | -0.8678650 | -2.5459720 | 2.4611460  |
| C | -0.9112900 | -3.3015520 | 3.6298040  |
| C | -1.5475950 | -4.5412390 | 3.6706450  |
| C | -2.1476610 | -4.9997780 | 2.4941800  |
| C | -2.1060390 | -4.2508730 | 1.3263670  |

|   |             |            |            |
|---|-------------|------------|------------|
| C | -0.2856740  | -4.0123980 | -1.2413050 |
| C | 0.0257620   | -4.7136930 | -2.3999720 |
| C | -0.6106860  | -4.4325220 | -3.6107210 |
| C | -1.5663850  | -3.4152640 | -3.6182770 |
| C | -1.8795040  | -2.7085280 | -2.4625470 |
| C | 2.1038900   | 3.2124240  | -2.4694750 |
| C | 1.7908920   | 3.9161410  | -3.6271170 |
| C | 0.8349940   | 4.9331970  | -3.6224450 |
| C | 0.1981380   | 5.2173490  | -2.4125640 |
| C | 0.5094290   | 4.5191100  | -1.2520440 |
| C | 1.0918420   | 3.0625030  | 2.4545800  |
| C | 1.1347020   | 3.8213680  | 3.6211160  |
| C | 1.7701690   | 5.0616090  | 3.6584950  |
| C | 2.3700960   | 5.5171570  | 2.4808090  |
| C | 2.3290340   | 4.7649570  | 1.3150880  |
| C | -1.5672010  | -5.3704650 | 4.9242290  |
| C | 1.7888990   | 5.8944880  | 4.9096560  |
| C | 0.5224240   | 5.7144430  | -4.8680240 |
| C | -0.2979710  | -5.2168360 | -4.8543420 |
| C | 11.1446550  | 1.5248990  | -0.0208910 |
| C | -10.9169610 | -1.0074310 | -0.0177440 |
| C | -11.6941740 | -2.1679470 | -0.0293890 |
| C | -13.0679680 | -1.9337220 | -0.0270530 |
| C | -13.3914710 | -0.5803960 | -0.0133330 |
| S | -11.9368400 | 0.3907290  | -0.0034140 |
| C | 11.9036200  | 2.6960480  | -0.0292650 |
| C | 13.2716510  | 2.4505710  | -0.0283450 |
| C | 13.6080720  | 1.0963160  | -0.0193380 |
| S | 12.1661210  | 0.1155730  | -0.0115380 |

|   |             |            |            |
|---|-------------|------------|------------|
| C | -14.6163390 | 0.1432300  | -0.0056990 |
| C | 14.9743570  | 0.7039140  | -0.0174520 |
| H | -1.1520290  | 2.4236430  | -0.0141470 |
| H | 1.3760910   | -1.9133280 | -0.0092680 |
| H | 4.7804480   | 3.3356720  | -0.0329520 |
| H | -4.5564360  | -2.8254090 | -0.0255820 |
| H | 6.9244060   | 3.4008140  | -0.0392520 |
| H | -6.7002090  | -2.8903600 | -0.0386770 |
| H | -0.3664520  | -1.5850210 | 2.4694870  |
| H | -0.4382090  | -2.9149010 | 4.5276360  |
| H | -2.6540480  | -5.9607450 | 2.4920200  |
| H | -2.5689000  | -4.6419940 | 0.4260250  |
| H | 0.2161790   | -4.2665840 | -0.3136920 |
| H | 0.7769950   | -5.4971310 | -2.3607830 |
| H | -2.0757470  | -3.1682920 | -4.5451660 |
| H | -2.6221790  | -1.9193950 | -2.5058360 |
| H | 2.8468520   | 2.4234380  | -2.5105040 |
| H | 2.3006310   | 3.6669900  | -4.5532160 |
| H | -0.5532020  | 6.0007850  | -2.3755550 |
| H | 0.0073770   | 4.7757060  | -0.3251970 |
| H | 0.5910620   | 2.1012420  | 2.4656280  |
| H | 0.6617620   | 3.4369780  | 4.5199950  |
| H | 2.8758360   | 6.4784460  | 2.4759690  |
| H | 2.7917420   | 5.1538530  | 0.4137090  |
| H | -0.7918010  | -6.1434010 | 4.8979350  |
| H | -2.5260670  | -5.8789920 | 5.0516210  |
| H | -1.3888130  | -4.7582610 | 5.8106470  |
| H | 2.7467710   | 6.4053900  | 5.0349230  |
| H | 1.6123310   | 5.2845090  | 5.7979750  |

|   |             |            |            |
|---|-------------|------------|------------|
| H | 1.0118670   | 6.6657150  | 4.8816090  |
| H | 1.1689030   | 6.5944010  | -4.9541170 |
| H | -0.5106630  | 6.0693120  | -4.8679660 |
| H | 0.6733550   | 5.1112820  | -5.7660940 |
| H | -0.9484260  | -6.0937690 | -4.9414560 |
| H | 0.7334120   | -5.5765800 | -4.8506300 |
| H | -0.4432210  | -4.6140590 | -5.7536210 |
| H | -11.2652390 | -3.1567660 | -0.0391930 |
| H | -13.8263150 | -2.7025890 | -0.0348430 |
| H | 11.4738190  | 3.6839550  | -0.0354810 |
| H | 14.0260270  | 3.2286260  | -0.0339300 |
| H | 15.6174190  | 1.5777690  | -0.0240440 |
| F | 9.3297010   | 3.7506580  | -0.0437080 |
| F | -9.1092760  | -3.2386060 | -0.0423610 |
| C | 15.6223890  | -0.5022060 | -0.0093290 |
| C | 17.0747400  | -0.6977900 | -0.0088050 |
| C | 17.3088400  | -2.1467930 | 0.0018030  |
| C | 16.0924080  | -2.7960180 | 0.0072440  |
| C | 14.9766420  | -1.8442150 | 0.0008150  |
| O | 13.7862400  | -2.0968280 | 0.0032560  |
| C | 18.0867270  | 0.2353700  | -0.0164410 |
| C | 19.4572000  | -0.1563140 | -0.0142970 |
| N | 20.5772680  | -0.4663100 | -0.0126010 |
| C | 17.8836150  | 1.6450020  | -0.0270220 |
| N | 17.7474490  | 2.7996600  | -0.0357590 |
| C | 18.4086630  | -3.0476750 | 0.0079590  |
| C | 17.9712660  | -4.3446120 | 0.0179010  |
| S | 16.2470400  | -4.4907920 | 0.0198990  |
| H | 19.4534390  | -2.7731880 | 0.0053680  |

|   |             |            |            |
|---|-------------|------------|------------|
| H | 18.5785960  | -5.2385880 | 0.0242810  |
| C | -15.9331130 | -0.2422850 | -0.0100360 |
| C | -17.0729670 | 0.6850640  | 0.0002340  |
| C | -18.2927740 | -0.1299810 | -0.0085880 |
| C | -17.9357720 | -1.4602520 | -0.0235000 |
| C | -16.4803250 | -1.6346950 | -0.0255230 |
| O | -15.8818850 | -2.6950690 | -0.0374160 |
| C | -17.0894680 | 2.0614280  | 0.0153400  |
| C | -18.3171950 | 2.7864400  | 0.0236590  |
| N | -19.3109380 | 3.3889390  | 0.0305770  |
| C | -15.9338270 | 2.8941090  | 0.0239670  |
| N | -15.0171190 | 3.6091970  | 0.0313350  |
| C | -19.7025160 | 0.0565290  | -0.0062260 |
| C | -20.3492850 | -1.1496790 | -0.0195530 |
| S | -19.2772720 | -2.5078060 | -0.0349360 |
| H | -20.2175610 | 1.0058140  | 0.0045230  |
| H | -21.4169270 | -1.3177540 | -0.0211990 |
| H | -14.4602380 | 1.2172960  | 0.0059770  |

Molecule A4

| Symbol | X          | Y          | Z          |
|--------|------------|------------|------------|
| C      | 1.7609040  | 0.6443140  | 0.0238040  |
| C      | 1.1380060  | -0.6055050 | 0.0964020  |
| C      | -0.2438840 | -0.6384130 | 0.0839990  |
| C      | -0.9898010 | 0.5606550  | -0.0209330 |
| C      | -0.3668520 | 1.8096710  | -0.1032920 |
| C      | 1.0144600  | 1.8439590  | -0.0701170 |
| C      | 1.9339370  | 3.0720090  | -0.1627060 |
| C      | 3.2921760  | 2.3901770  | -0.1053550 |
| C      | 3.1522780  | 1.0213550  | 0.0105180  |



|   |            |            |            |
|---|------------|------------|------------|
| C | -1.1635550 | -1.8686050 | 0.1367650  |
| C | -2.5208850 | -1.1888070 | 0.0405430  |
| C | -2.3806580 | 0.1829830  | -0.0331780 |
| C | -3.8585110 | -1.5948880 | 0.0505600  |
| C | -4.7464580 | -0.5265930 | -0.0230610 |
| S | -3.8824620 | 1.0036020  | -0.0967360 |
| C | 4.6291950  | 2.7986390  | -0.1048250 |
| C | 5.5173020  | 1.7337850  | 0.0043100  |
| S | 4.6545010  | 0.2050020  | 0.1103760  |
| C | 1.8189710  | 4.0175510  | 1.0397310  |
| C | 1.6663440  | 3.7804010  | -1.4965960 |
| C | -1.1000830 | -2.6244040 | 1.4706060  |
| C | -0.8470940 | -2.7680960 | -1.0644860 |
| C | -6.1862910 | -0.6128150 | -0.0360590 |
| C | 6.9568010  | 1.8233270  | 0.0434950  |
| C | -6.8554020 | -1.8256240 | 0.0153910  |
| C | -8.2534960 | -1.9293520 | 0.0089960  |
| C | -9.1490570 | -0.8682470 | -0.0488470 |
| C | -8.4884160 | 0.4043620  | -0.1055890 |
| C | -7.0485560 | 0.5348750  | -0.1000050 |
| C | 7.6224590  | 3.0388010  | 0.0319060  |
| C | 9.0196790  | 3.1456250  | 0.0690020  |
| C | 9.9172830  | 2.0864430  | 0.1248310  |
| C | 9.2604940  | 0.8105130  | 0.1337310  |
| C | 7.8211940  | 0.6770780  | 0.0972130  |
| N | -9.1123540 | 1.5759070  | -0.1682690 |
| S | -7.9666800 | 2.7324900  | -0.2157010 |
| N | -6.6387480 | 1.7969000  | -0.1586690 |
| N | 9.8857960  | -0.3615380 | 0.1760560  |

|   |             |            |            |
|---|-------------|------------|------------|
| S | 8.7418530   | -1.5209230 | 0.1760150  |
| N | 7.4135280   | -0.5869320 | 0.1163790  |
| C | 1.2305960   | 3.6259830  | 2.2415620  |
| C | 1.2219010   | 4.4772900  | 3.3427700  |
| C | 1.7996750   | 5.7451230  | 3.2857100  |
| C | 2.3949750   | 6.1314520  | 2.0814640  |
| C | 2.4049510   | 5.2867030  | 0.9798910  |
| C | 0.6666150   | 4.7521650  | -1.5970000 |
| C | 0.3626170   | 5.3397730  | -2.8189690 |
| C | 1.0442440   | 4.9833930  | -3.9847330 |
| C | 2.0372530   | 4.0082340  | -3.8806210 |
| C | 2.3438060   | 3.4153450  | -2.6607480 |
| C | -1.4669990  | -2.5731190 | -2.2997140 |
| C | -1.1141620  | -3.3402580 | -3.4041380 |
| C | -0.1302020  | -4.3268170 | -3.3183700 |
| C | 0.4932780   | -4.5132330 | -2.0829220 |
| C | 0.1426540   | -3.7507800 | -0.9750300 |
| C | -0.5452060  | -2.0633390 | 2.6195960  |
| C | -0.5811250  | -2.7425570 | 3.8344500  |
| C | -1.1717250  | -4.0002720 | 3.9470160  |
| C | -1.7338590  | -4.5567840 | 2.7940730  |
| C | -1.6991200  | -3.8845450 | 1.5804050  |
| C | 1.7617740   | 6.6756240  | 4.4654270  |
| C | -1.1836990  | -4.7465980 | 5.2515800  |
| C | 0.2247980   | -5.1768880 | -4.5059960 |
| C | 0.7382820   | 5.6474930  | -5.2979650 |
| C | -10.5871090 | -1.0113390 | -0.0517700 |
| C | 11.3532650  | 2.2392230  | 0.1817550  |
| C | 12.0878320  | 3.4283730  | 0.2091110  |

|   |             |            |            |
|---|-------------|------------|------------|
| C | 13.4618920  | 3.2235860  | 0.2449540  |
| C | 13.8290450  | 1.8784530  | 0.2778350  |
| S | 12.4148580  | 0.8669070  | 0.2259740  |
| C | -11.3295910 | -2.1987080 | -0.0004830 |
| C | -12.7052580 | -2.0090100 | -0.0165190 |
| C | -13.0735460 | -0.6628980 | -0.0813980 |
| S | -11.6456110 | 0.3529980  | -0.1225850 |
| C | 15.1695270  | 1.4344760  | 0.2062720  |
| C | -14.3103350 | 0.0191470  | -0.1206320 |
| H | 1.7201090   | -1.5186230 | 0.1541100  |
| H | -0.9484890  | 2.7200910  | -0.1970680 |
| H | -4.1780590  | -2.6262520 | 0.1154040  |
| H | 4.9474050   | 3.8297050  | -0.1800920 |
| H | -6.3175910  | -2.7630490 | 0.0647930  |
| H | 7.0822920   | 3.9756730  | 0.0012420  |
| H | 0.7755190   | 2.6458200  | 2.3261970  |
| H | 0.7550680   | 4.1445320  | 4.2650960  |
| H | 2.8563220   | 7.1117220  | 2.0040580  |
| H | 2.8628100   | 5.6222820  | 0.0549500  |
| H | 0.1283640   | 5.0640330  | -0.7081220 |
| H | -0.4184850  | 6.0929450  | -2.8658700 |
| H | 2.5822380   | 3.7042480  | -4.7694880 |
| H | 3.1174000   | 2.6563990  | -2.6181900 |
| H | -2.2310270  | -1.8105060 | -2.4042380 |
| H | -1.6144480  | -3.1661410 | -4.3522500 |
| H | 1.2653490   | -5.2705140 | -1.9831530 |
| H | 0.6359980   | -3.9326350 | -0.0261220 |
| H | -0.0801830  | -1.0853780 | 2.5728650  |
| H | -0.1381990  | -2.2810570 | 4.7120080  |

|   |             |            |            |
|---|-------------|------------|------------|
| H | -2.2038130  | -5.5346020 | 2.8470730  |
| H | -2.1300790  | -4.3510540 | 0.7003850  |
| H | 0.9229810   | 7.3755510  | 4.3883580  |
| H | 2.6750210   | 7.2715890  | 4.5334180  |
| H | 1.6447090   | 6.1277410  | 5.4026960  |
| H | -2.1381330  | -5.2541470 | 5.4123090  |
| H | -1.0103310  | -4.0769830 | 6.0963340  |
| H | -0.4020240  | -5.5131280 | 5.2739180  |
| H | -0.4158390  | -6.0635010 | -4.5612610 |
| H | 1.2584640   | -5.5256170 | -4.4529990 |
| H | 0.0999180   | -4.6274960 | -5.4418170 |
| H | 1.3405500   | 6.5525020  | -5.4312690 |
| H | -0.3111650  | 5.9440810  | -5.3605030 |
| H | 0.9542610   | 4.9861280  | -6.1398920 |
| H | 11.6274250  | 4.4023140  | 0.1963430  |
| H | 14.1932060  | 4.0225610  | 0.2527720  |
| H | -10.8685270 | -3.1717100 | 0.0472180  |
| H | -13.4397480 | -2.7999420 | 0.0171260  |
| H | 15.8749110  | 2.2234590  | -0.0572790 |
| F | -8.7151650  | -3.1844650 | 0.0648710  |
| F | 9.4794920   | 4.4031090  | 0.0512870  |
| C | -15.6243080 | -0.4093290 | -0.0974160 |
| C | -16.7924110 | 0.4683950  | -0.1469120 |
| C | -17.9996620 | -0.3911890 | -0.0660980 |
| C | -17.5904280 | -1.7256580 | 0.0142480  |
| C | -16.1102640 | -1.8014150 | -0.0049680 |
| O | -15.4832200 | -2.8451630 | 0.0505290  |
| C | -16.8393800 | 1.8415270  | -0.2564180 |
| C | -18.0569300 | 2.5815090  | -0.2938380 |

|   |             |            |            |
|---|-------------|------------|------------|
| N | -19.0257870 | 3.2227070  | -0.3273830 |
| C | -15.6944050 | 2.6853850  | -0.3488150 |
| N | -14.7917260 | 3.4139160  | -0.4275740 |
| C | -19.3616590 | -0.0978910 | -0.0586600 |
| C | -20.2767920 | -1.1537600 | 0.0284080  |
| C | -19.8422450 | -2.4976730 | 0.1070590  |
| C | -18.4748480 | -2.7818800 | 0.0994090  |
| H | -19.7442400 | 0.9109910  | -0.1163360 |
| H | -18.1105970 | -3.8004400 | 0.1590830  |
| C | 15.7695340  | 0.1997030  | 0.2524760  |
| C | 15.3515410  | -1.1239540 | 0.6652590  |
| C | 16.2364230  | -2.0944670 | -0.0233590 |
| C | 17.3008200  | -1.3900560 | -0.6055570 |
| C | 17.1001570  | 0.0690320  | -0.3999400 |
| O | 17.8466950  | 0.9581030  | -0.7543120 |
| C | 14.4917000  | -1.4383460 | 1.6938430  |
| C | 14.1474100  | -2.7793500 | 2.0283650  |
| N | 13.8407000  | -3.8675330 | 2.2979190  |
| C | 13.9878530  | -0.4519190 | 2.5884630  |
| N | 13.6135820  | 0.3274400  | 3.3648560  |
| C | 16.1874190  | -3.4801790 | -0.1330420 |
| C | 17.2114860  | -4.1331980 | -0.8300340 |
| C | 18.2877900  | -3.4112630 | -1.3972190 |
| C | 18.3292090  | -2.0190130 | -1.2779270 |
| H | 15.3851000  | -4.0688460 | 0.2903710  |
| H | 19.1418720  | -1.4441640 | -1.7056060 |
| H | -14.1852070 | 1.0950480  | -0.1777020 |
| C | -21.6749960 | -0.8537670 | 0.0375190  |
| N | -22.8056910 | -0.5951570 | 0.0440900  |

|   |             |            |            |
|---|-------------|------------|------------|
| C | -20.7866970 | -3.5662260 | 0.1949470  |
| N | -21.5296360 | -4.4542790 | 0.2671580  |
| C | 19.3304330  | -4.0912170 | -2.0987620 |
| N | 20.1897800  | -4.6165320 | -2.6744170 |
| C | 17.1526560  | -5.5553870 | -0.9673210 |
| N | 17.0855850  | -6.7085950 | -1.0723560 |
